# Supplementary material for: Labile ruthenium(ii) complexes with extended phenyl-substituted terpyridyl ligands: synthesis, aquation and anticancer evaluation
Source: Royal Society of Chemistry journal article supplement (doi:10.1039/c5dt02446c), 2015-01-01
Supplement: c5dt02446c1.pdf [file c5dt02446c1.pdf]

*Supporting Information*

**Labile ruthenium(II) complexes with extended phenyl-substituted terpyridyl ligands: synthesis, aquation and anticancer evaluation**

Huaiyi Huang, Pingyu Zhang, Yu Chen, Liangnian Ji\* and Hui Chao\*

*MOE Laboratory of Bioinorganic and Synthetic Chemistry, School of Chemistry and Chemical Engineering, Sun Yat-Sen University, Guangzhou 510275, P. R. China*

Email: [cesjln@mail.sysu.edu.cn](mailto:cesjln@mail.sysu.edu.cn); [ceschh@mail.sysu.edu.cn](mailto:ceschh@mail.sysu.edu.cn)

**Content**

|                   |                                                                           |    |
|-------------------|---------------------------------------------------------------------------|----|
| <b>Figure S1</b>  | ES-MS spectrum of <b>Ru1</b> .....                                        | 2  |
| <b>Figure S2</b>  | <sup>1</sup> H NMR spectrum of <b>Ru1</b> .....                           | 2  |
| <b>Figure S3</b>  | ES-MS spectrum of <b>Ru2</b> .....                                        | 3  |
| <b>Figure S4</b>  | <sup>1</sup> H NMR spectrum of <b>Ru2</b> .....                           | 3  |
| <b>Figure S5</b>  | ES-MS spectrum of <b>Ru3</b> .....                                        | 4  |
| <b>Figure S6</b>  | <sup>1</sup> H NMR spectrum of <b>Ru3</b> .....                           | 4  |
| <b>Figure S7</b>  | Aquation of <b>Ru1</b> tracking by UV-vis spectra and LC-MS spectra ..... | 5  |
| <b>Figure S8</b>  | Aquation of <b>Ru1</b> tracking by UV-vis spectra and LC-MS spectra ..... | 6  |
| <b>Figure S9</b>  | Aquation of <b>Ru1-Ru3</b> in present of 100 mM NaCl .....                | 7  |
| <b>Figure S10</b> | Aquation of <b>Ru1-Ru3</b> in present of 23 mM NaCl .....                 | 8  |
| <b>Figure S11</b> | Aquation of <b>Ru1-Ru3</b> in present of 4 mM NaCl .....                  | 9  |
| <b>Figure S12</b> | <b>Ru1</b> with increasing concentration in PBS buffer.....               | 10 |
| <b>Figure S13</b> | <b>Ru2</b> with increasing concentration in PBS buffer.....               | 11 |
| <b>Figure S14</b> | <b>Ru3</b> with increasing concentration in PBS buffer.....               | 12 |
| <b>Figure S15</b> | Ethidium bromide stained agarose gels of pUC19 plasmid DNA.....           | 13 |
| <b>Figure S16</b> | MALDI-TOF mass spectra.....                                               | 13 |

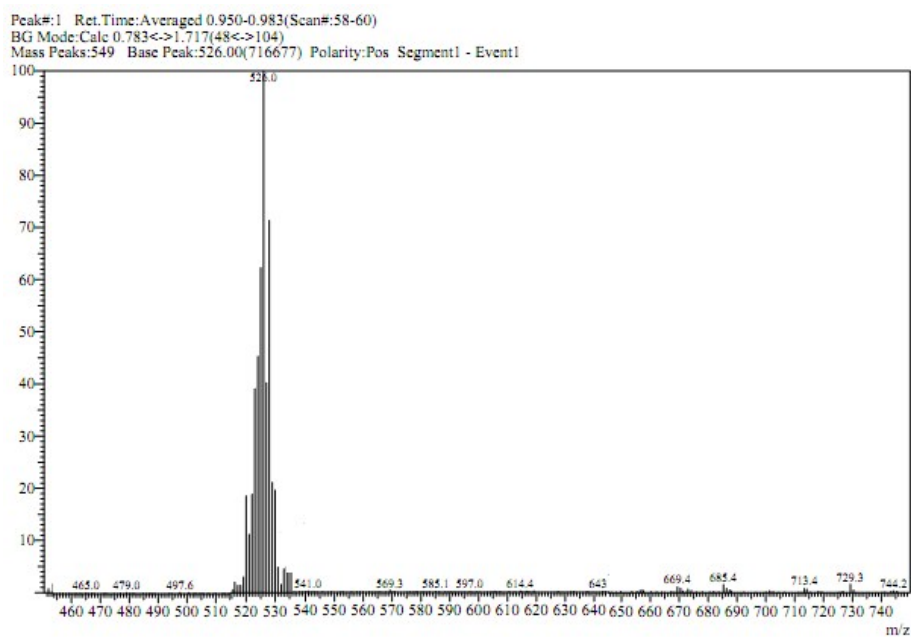

**Fig. S1** ES-MS (CH<sub>3</sub>OH) spectrum of **Ru1**.

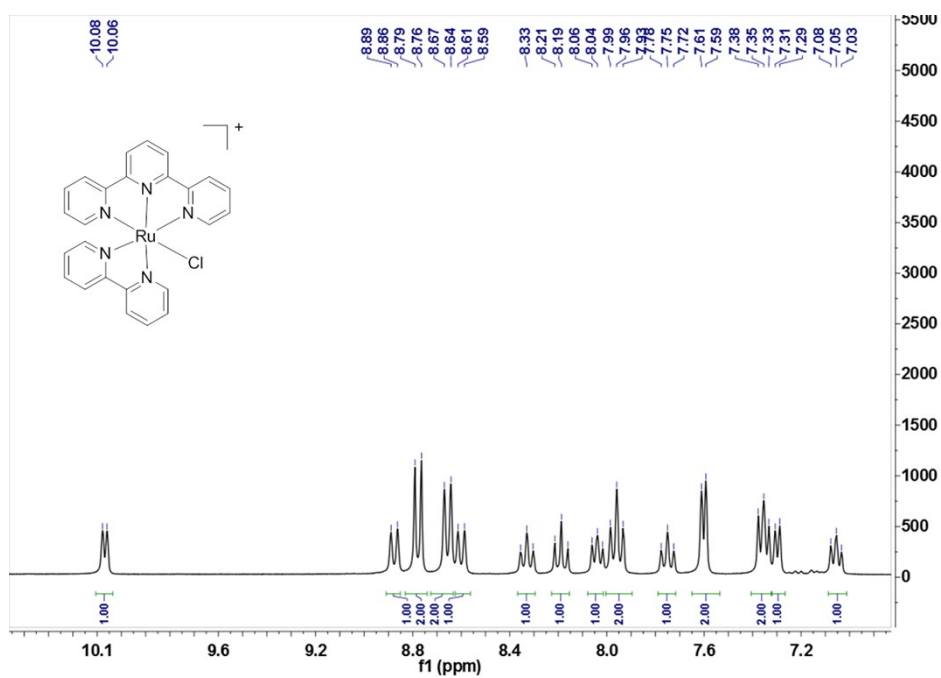

**Fig. S2** <sup>1</sup>H NMR spectrum (300 MHz, DMSO-*d*<sub>6</sub>) of **Ru1**.

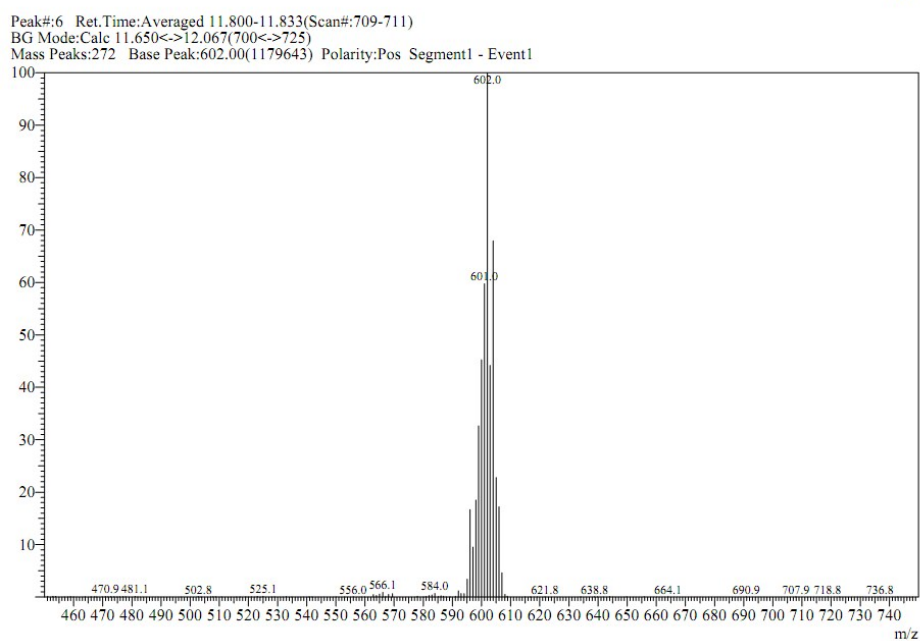

**Fig. S3** ES-MS (CH<sub>3</sub>OH) spectrum of **Ru2**.

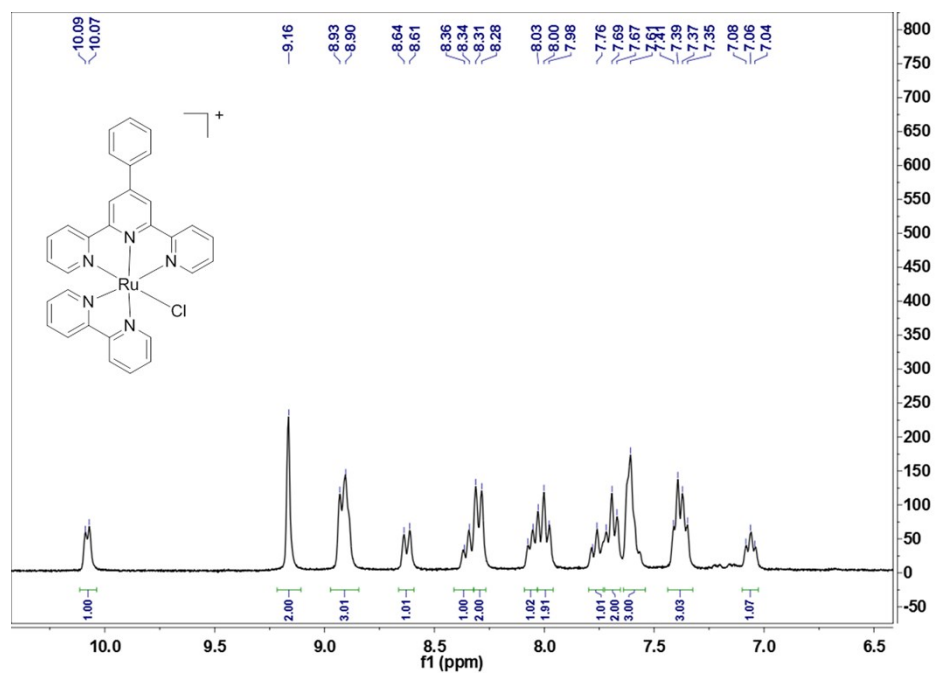

**Fig. S4** <sup>1</sup>H NMR spectrum (300 MHz, DMSO-*d*<sub>6</sub>) of **Ru2**.

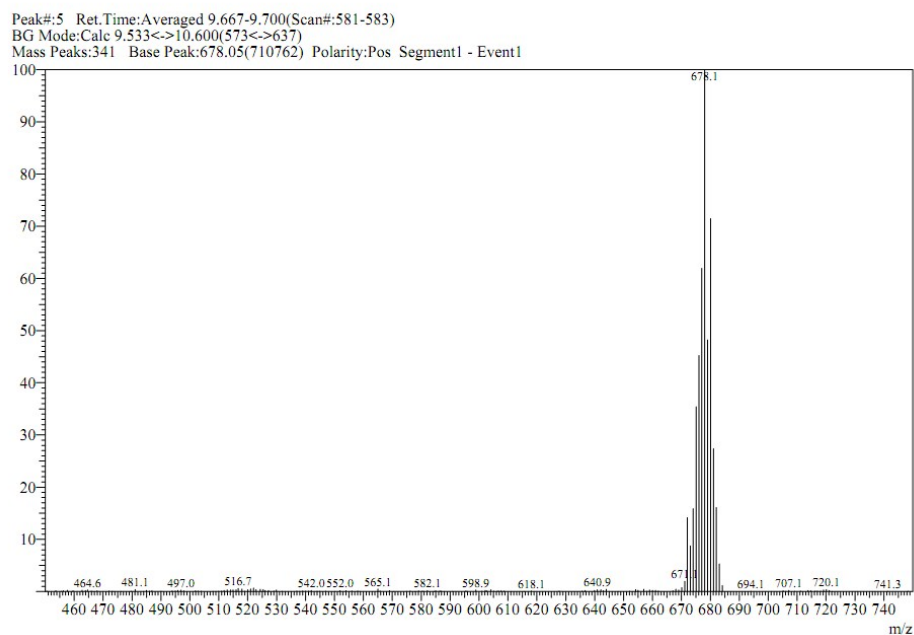

**Fig. S5** ES-MS (CH<sub>3</sub>OH) spectrum of **Ru3**.

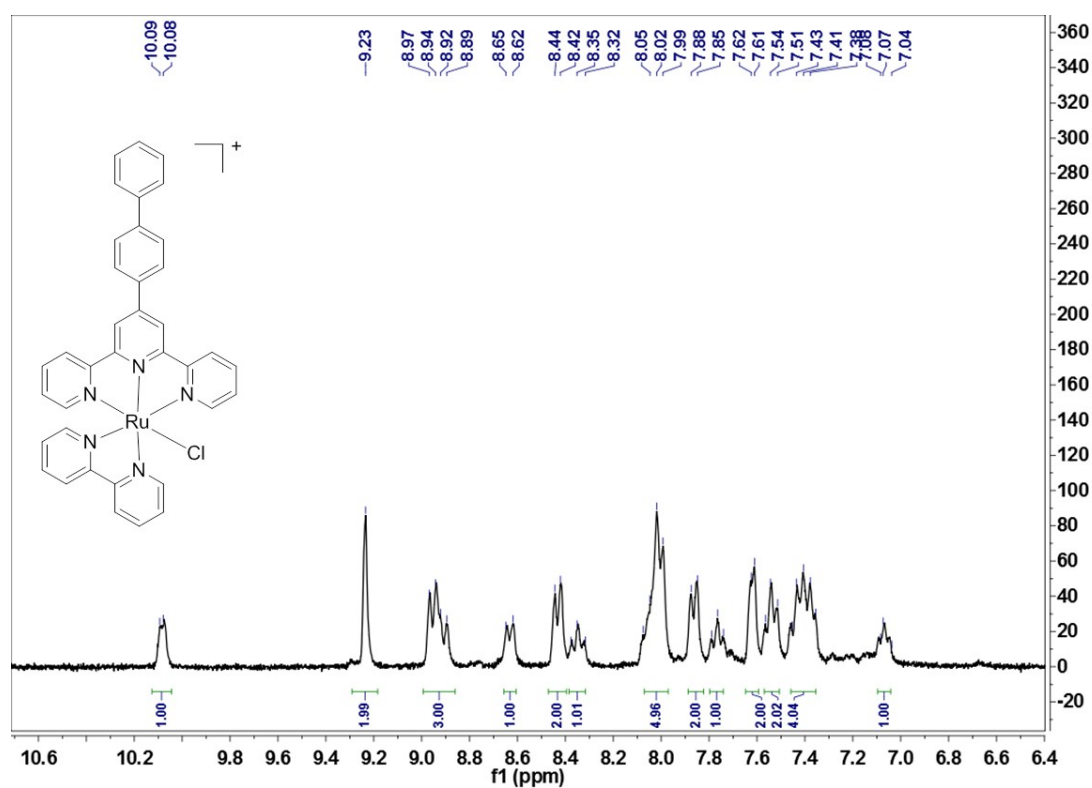

**Fig. S6** <sup>1</sup>H NMR spectrum (300 MHz, DMSO-*d*<sub>6</sub>) of **Ru3**.

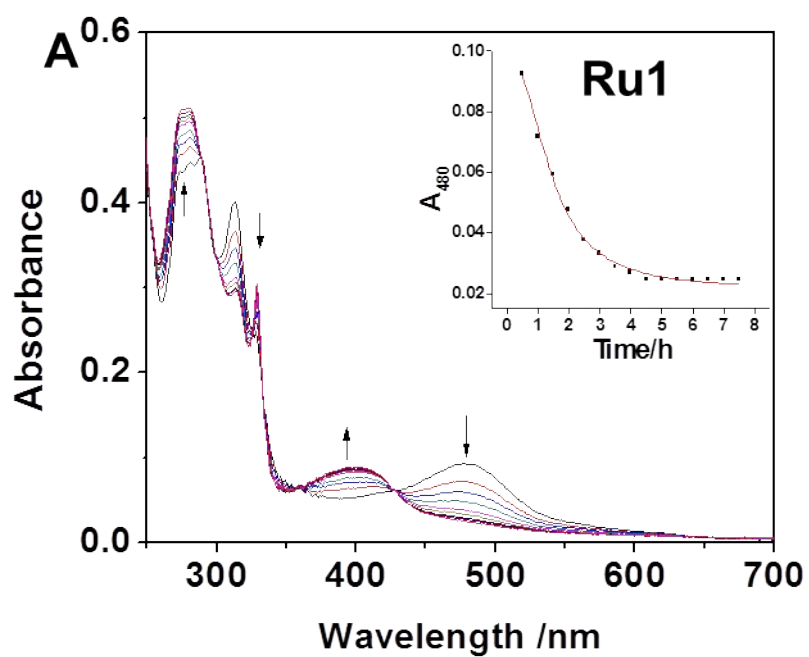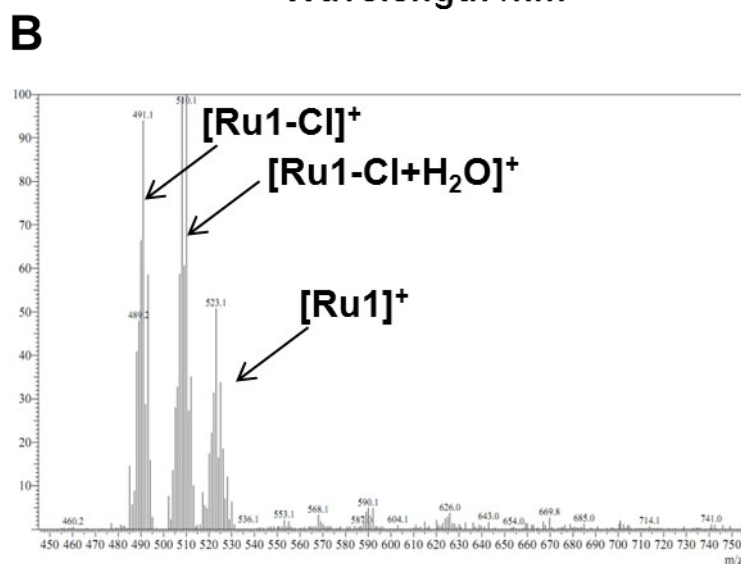

**Fig. S7** (A) Aquation of **Ru1** in PBS buffer solution (pH = 7.4) tracking by UV-vis spectra. (B) LC-MS spectra of the aquated **Ru1**.

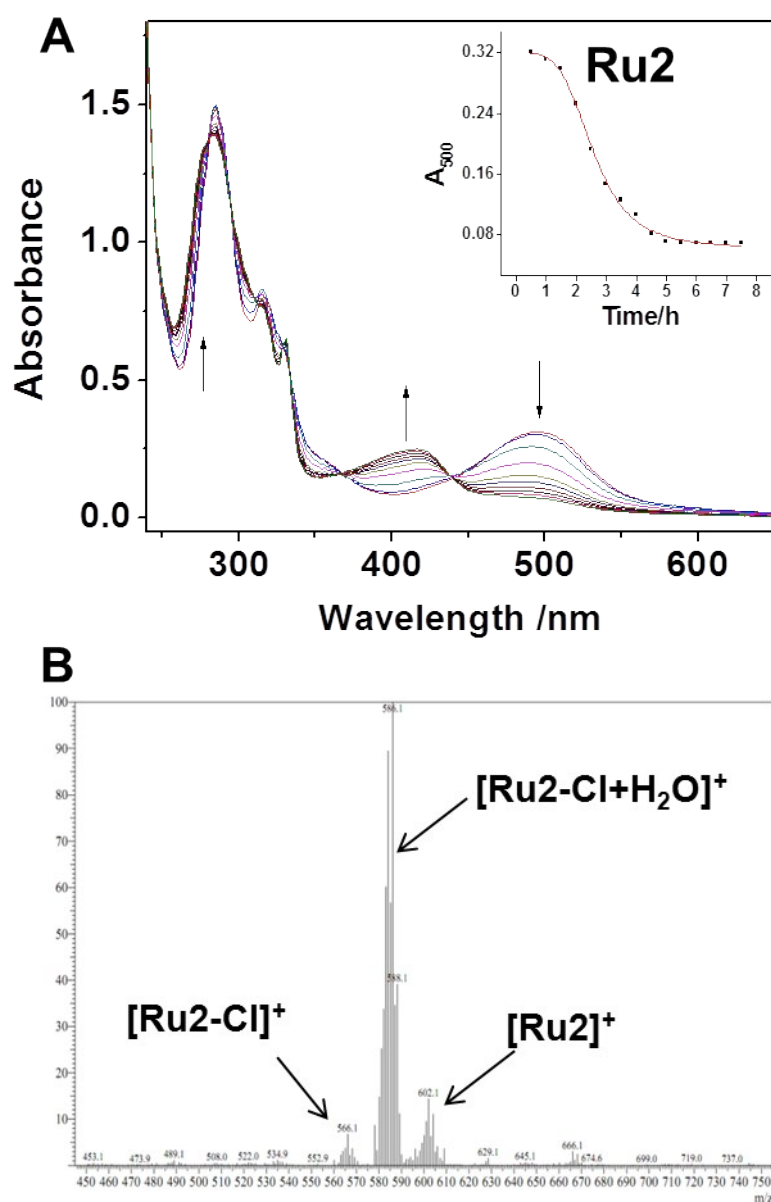

**Fig. S8** (A) Aquation of **Ru2** in PBS buffer solution (pH = 7.4) tracking by UV-vis spectra. (B) LC-MS spectra of the aquated **Ru2**.

## 100 mM NaCl

**Ru1**

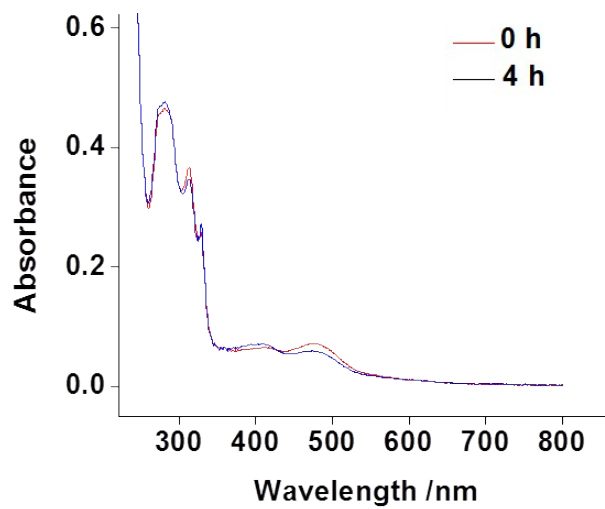

**Ru2**

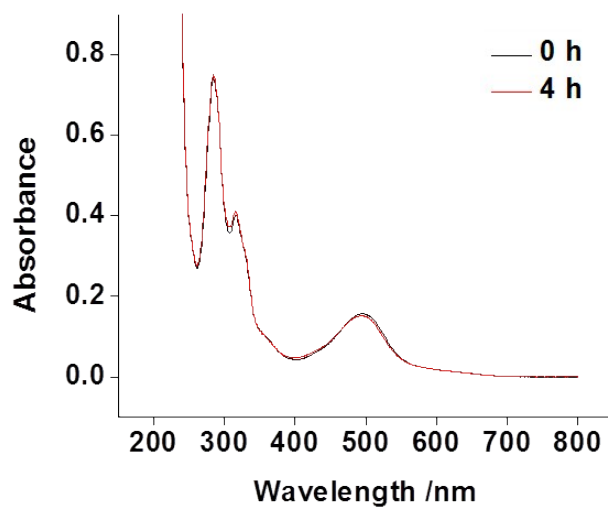

**Ru3**

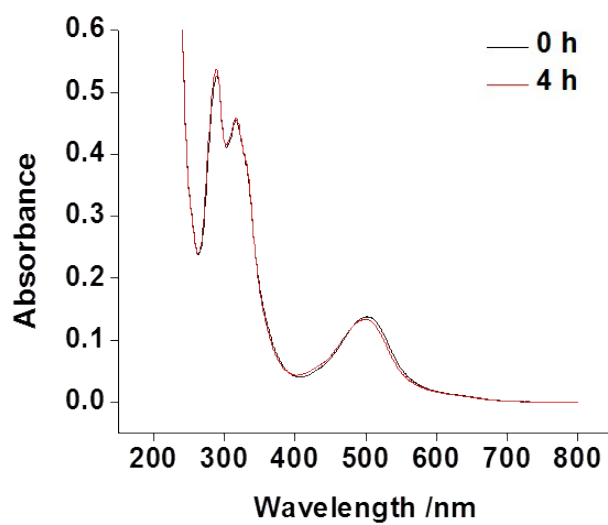

Fig. S9 Aquation of Ru1-Ru3 in present of 100 mM NaCl concentration by UV-vis spectra.

## 23 mM NaCl

**Ru1**

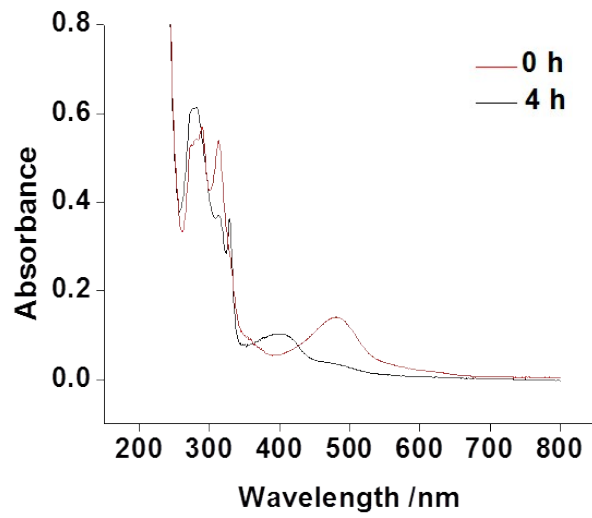

**Ru2**

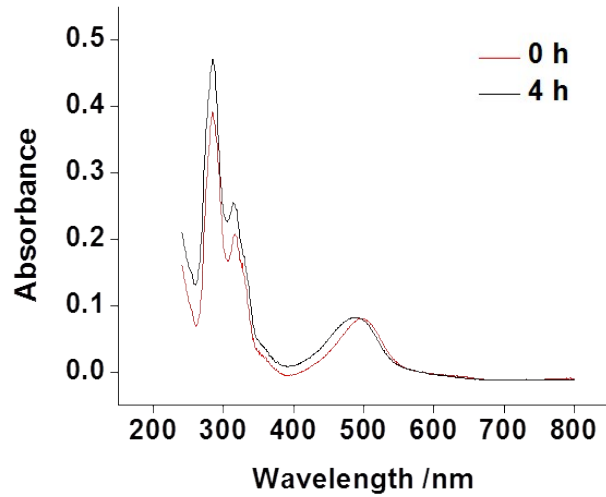

**Ru3**

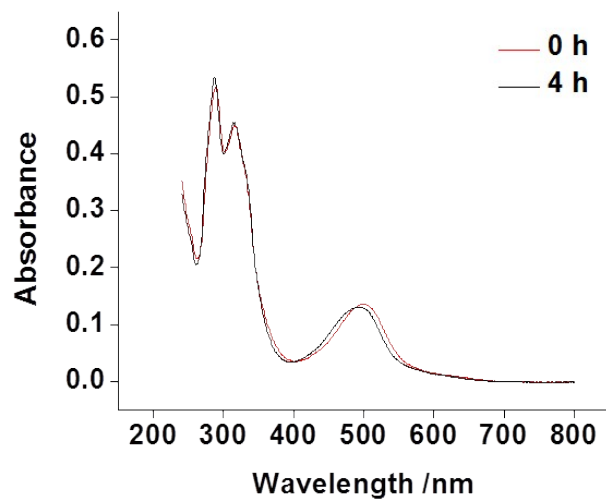

Fig. S10 Aquation of Ru1-Ru3 in present of 23 mM NaCl concentration by UV-vis spectra.



## 4 mM NaCl

**Ru1**

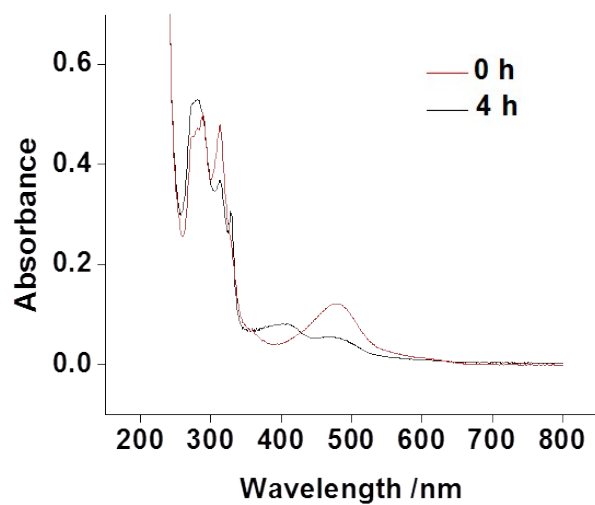

**Ru2**

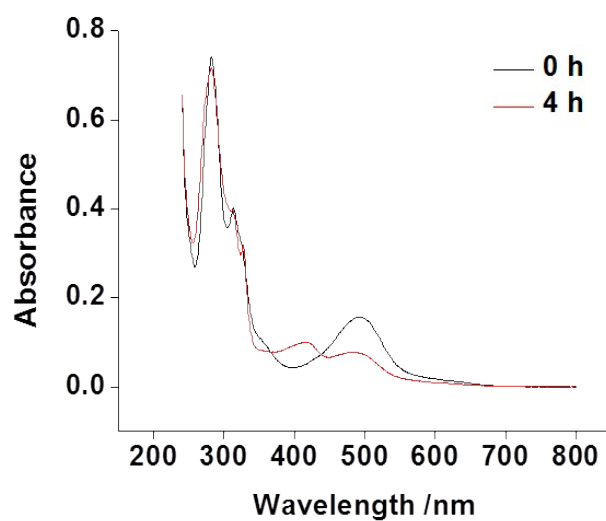

**Ru3**

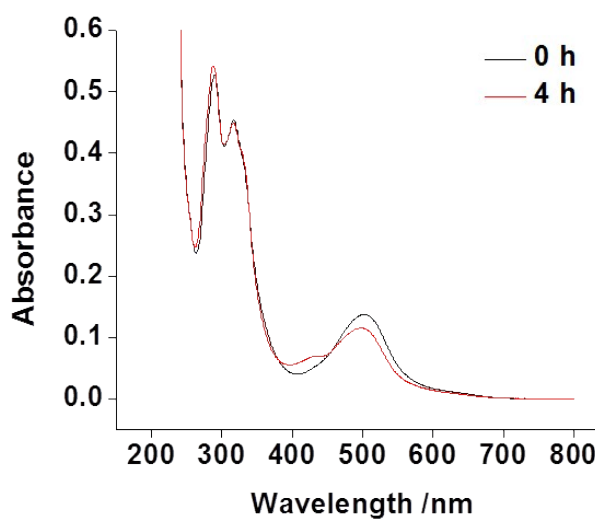

Fig. S11 Aquation of Ru1-Ru3 in present of 4 mM NaCl concentration by UV-vis spectra.

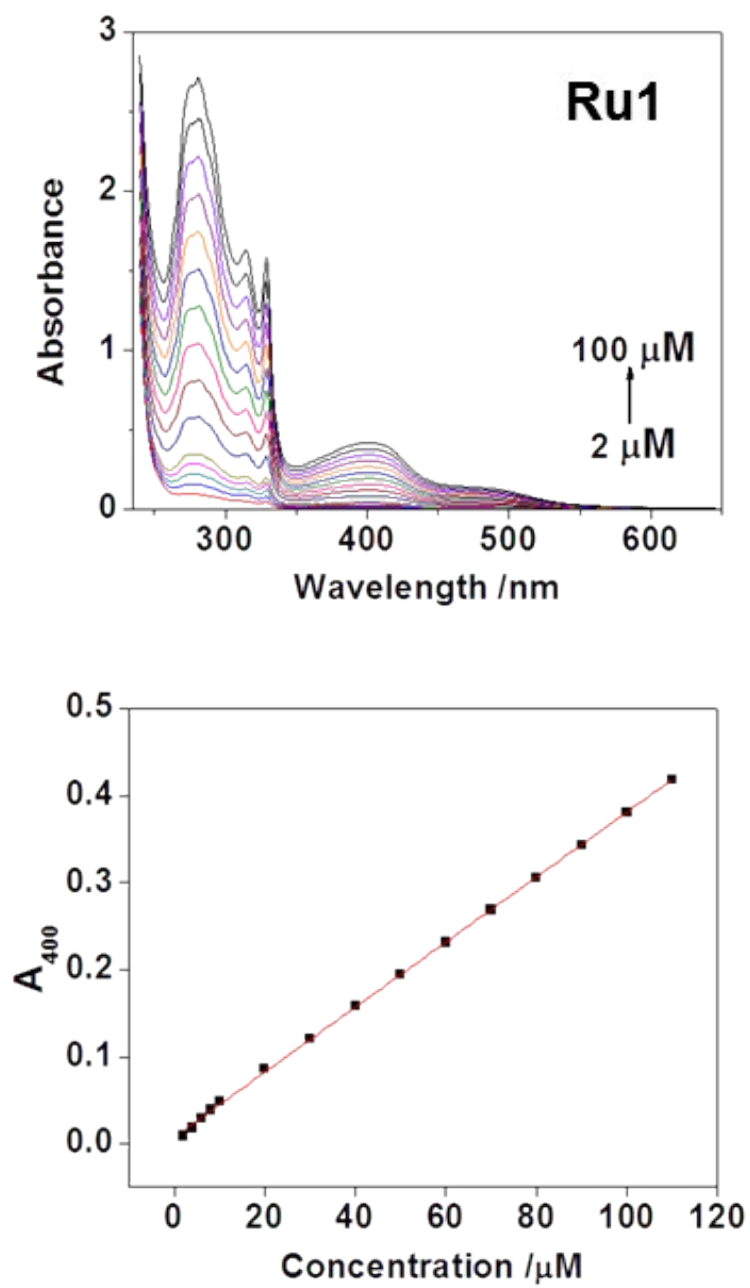

**Fig. S12** UV-vis spectrum of **Ru1** with increasing concentration in PBS buffer solution in present of 100 mM NaCl.

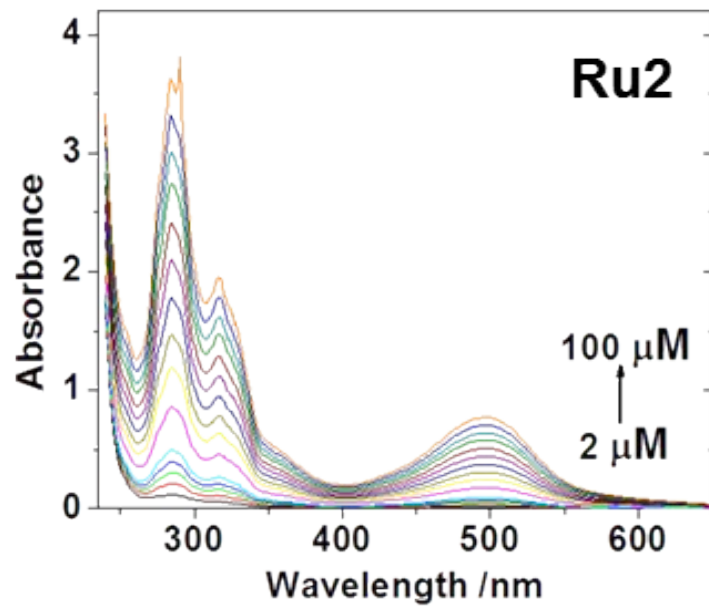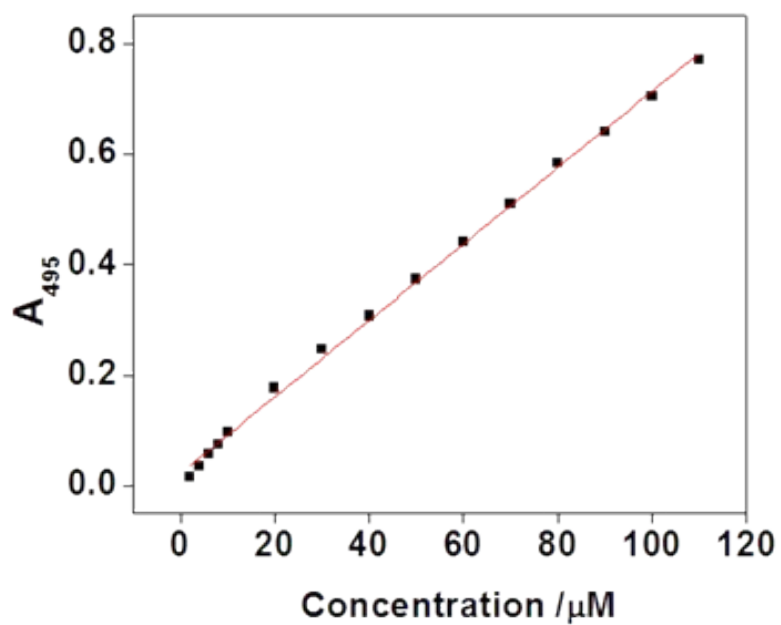

**Fig. S13** UV-vis spectrum of **Ru2** with increasing concentration in PBS buffer solution in present of 100 mM NaCl.

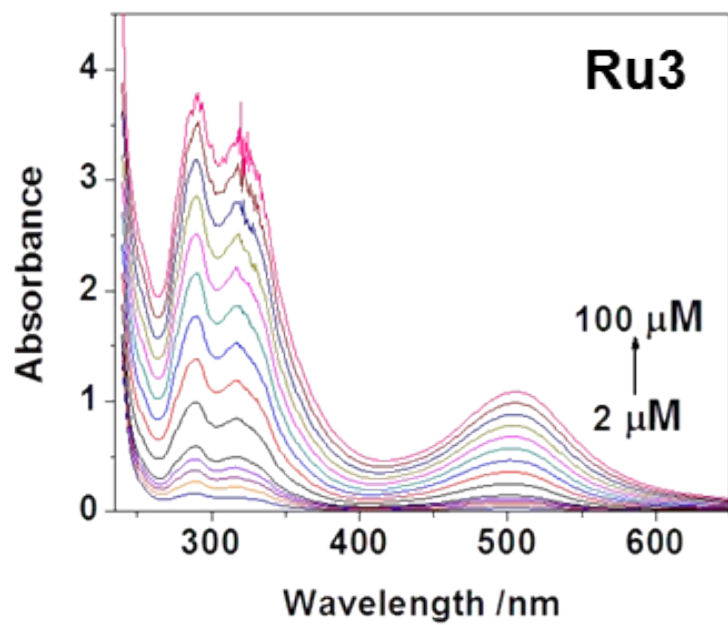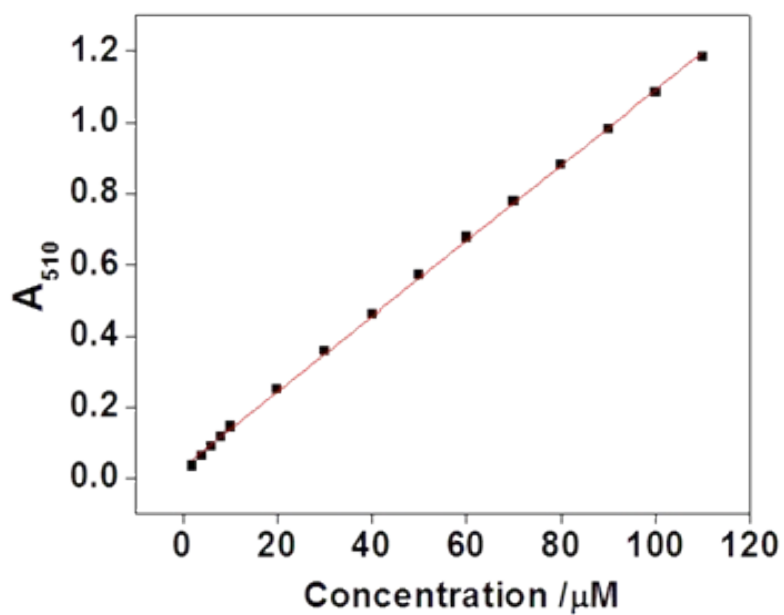

**Fig. S14** UV-vis spectrum of **Ru<sub>3</sub>** with increasing concentration in PBS buffer solution in present of 100 mM NaCl.

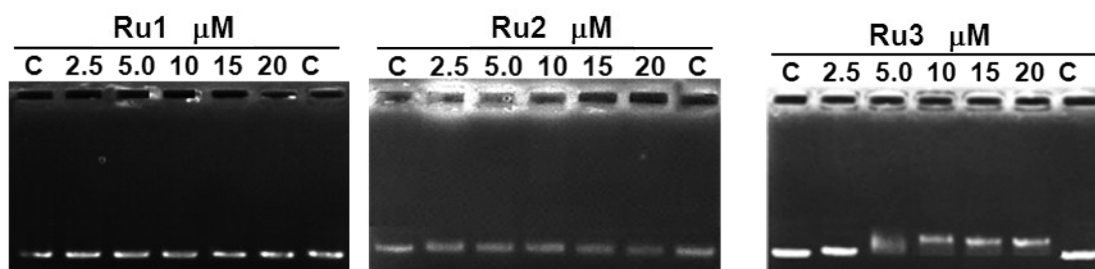

**Fig. S15** Ethidium bromide stained agarose gels of pUC19 plasmid DNA (10 mM phosphate, pH = 7.5) in the presence of **Ru1-Ru3**.

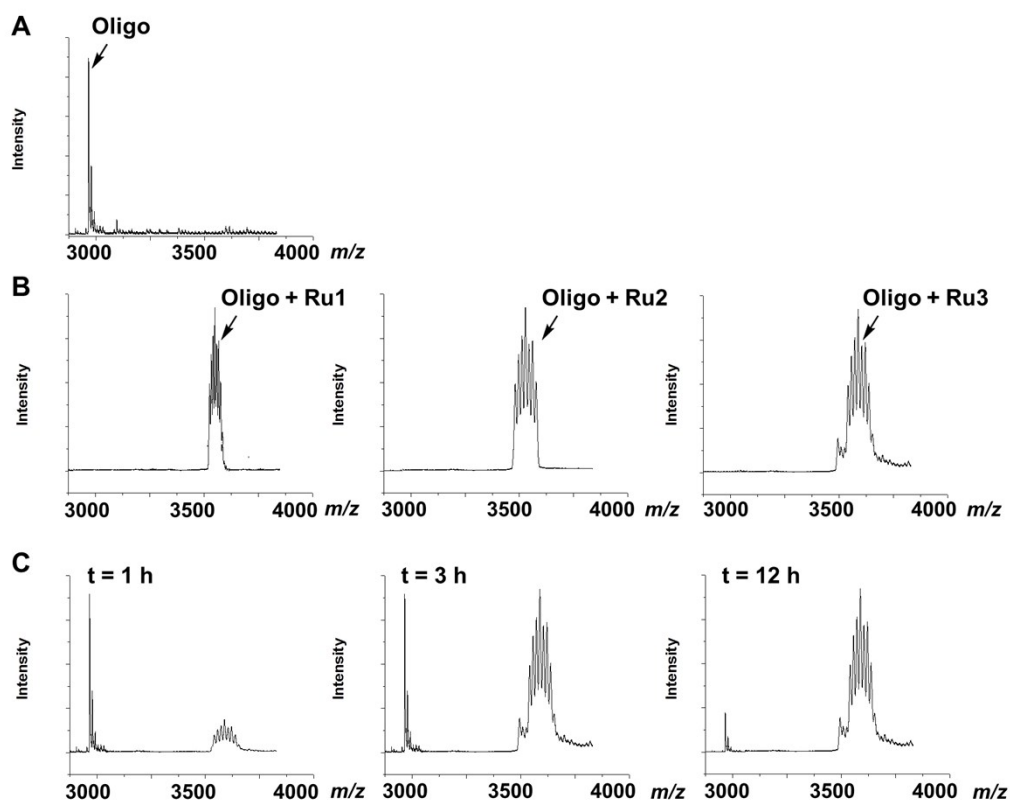

**Fig. S16** (A) MALDI-TOF mass spectra of free oligonucleotides OD1 and OD2. (B) Spectra of adducts of **Ru1-Ru3** with oligonucleotide after reaction for 12 h. (C) Spectra of adducts of adduct of **Ru3** with oligonucleotide with extending incubation time.
